# Supplementary material for: Narrow-band red-emitting phosphor with negligible concentration quenching for hybrid white LEDs and plant growth applications
Source: Royal Society of Chemistry journal article supplement (doi:10.1039/d1dt00449b), 2021-01-01
Supplement: d1dt00449b1.pdf [file d1dt00449b1.pdf]

## Supplementary Information

### Narrow band red emitting phosphor with negligible concentration quenching for hybrid white LEDs and plant growth applications

Kasturi Singh, Marikumar Rajendran, Rachna Devi and Sivakumar Vaidyanathan \*

Department of Chemistry, National Institute of Technology, Rourkela, Odisha – 769008

\*To whom correspondence should be addressed. Email: [vsiva@nitrkl.ac.in](mailto:vsiva@nitrkl.ac.in) (V. Sivakumar) Tel: +91-661-2462654;

**Table ST1** Lattice parameters for  $\text{Li}_3\text{BaSrLa}_{3-x}\text{Eu}_x(\text{MoO}_4)_8$  where  $x = 0 - 3$  (in steps of 0.3).

| Concentration of $\text{Eu}^{3+}(x)$ | a (Å)  | b (Å)   | c (Å)   | $\beta$ (Å) | V (Å <sup>3</sup> ) |
|--------------------------------------|--------|---------|---------|-------------|---------------------|
| 0.3                                  | 5.2816 | 12.8192 | 19.9946 | 92.8875     | 1291.305            |
| 0.6                                  | 5.2681 | 12.8141 | 19.4057 | 92.7371     | 1283.666            |
| 0.9                                  | 5.2655 | 12.7407 | 19.2631 | 92.7071     | 1280.374            |
| 1.2                                  | 5.2554 | 12.7236 | 19.2176 | 92.1894     | 1279.561            |
| 1.5                                  | 5.2468 | 12.7156 | 19.2170 | 92.1589     | 1277.002            |
| 1.8                                  | 5.2320 | 12.7138 | 19.2080 | 91.4221     | 1272.372            |
| 2.1                                  | 5.2218 | 12.7129 | 19.1818 | 91.3841     | 1270.752            |
| 2.4                                  | 5.1915 | 12.7096 | 19.1419 | 91.3637     | 1269.197            |
| 2.7                                  | 5.1903 | 12.6723 | 18.9812 | 90.8082     | 1265.653            |
| 3                                    | 5.1766 | 12.6640 | 19.2170 | 91.2714     | 1266.653            |

**Table ST2** The band gaps of  $\text{Li}_3\text{BaSrLa}_{3-x}\text{Eu}_x(\text{MoO}_4)_8$  where  $x = 0.3 - 3$

| Composition in terms of x        | 0.3  | 0.6  | 0.9  | 1.2  | 1.5  | 1.8  | 2.1  | 2.4  | 2.7  | 3    |
|----------------------------------|------|------|------|------|------|------|------|------|------|------|
| Band gap (E <sub>g</sub> ) in eV | 3.75 | 3.48 | 3.41 | 3.38 | 3.37 | 3.35 | 3.34 | 3.32 | 3.29 | 3.48 |

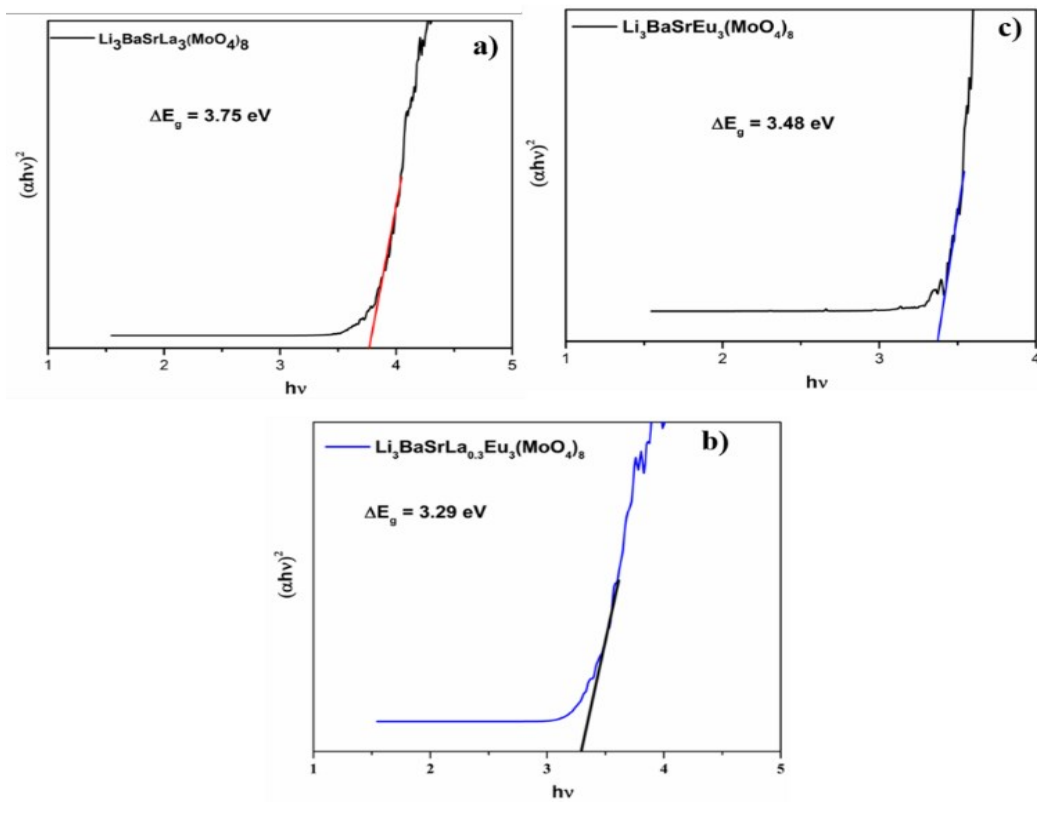

**Fig.S1.** The plot of  $(\alpha hv)^2$  versus  $h\nu$  host  $\text{Li}_3\text{BaSrLa}_3(\text{MoO}_4)_8$ , b)  $0.3\text{Eu}^{3+}$ :  $\text{Li}_3\text{BaSrLa}_3(\text{MoO}_4)_8$  and c)  $\text{Li}_3\text{BaSrEu}_3(\text{MoO}_4)_8$

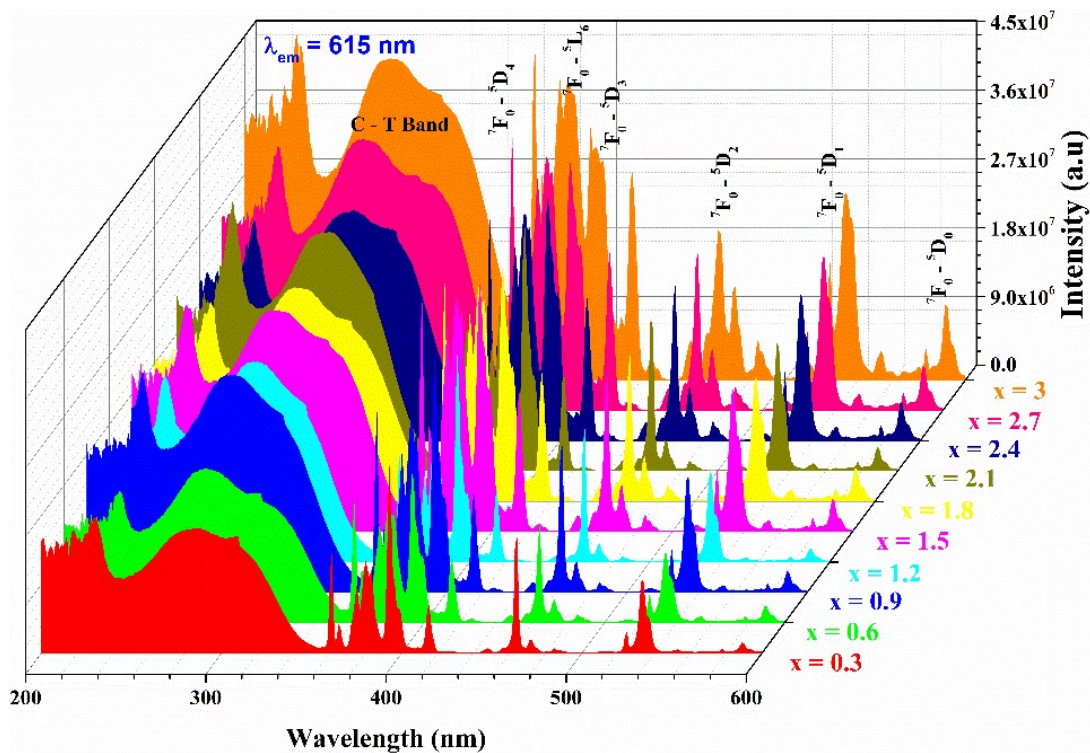

Fig.S2. PL excitation spectra of  $\text{Li}_3\text{BaSrLa}_{3-x}\text{Eu}_x(\text{MoO}_4)_8$  where  $x = 0 - 3$  at  $\lambda_{\text{em}} = 615$  nm.

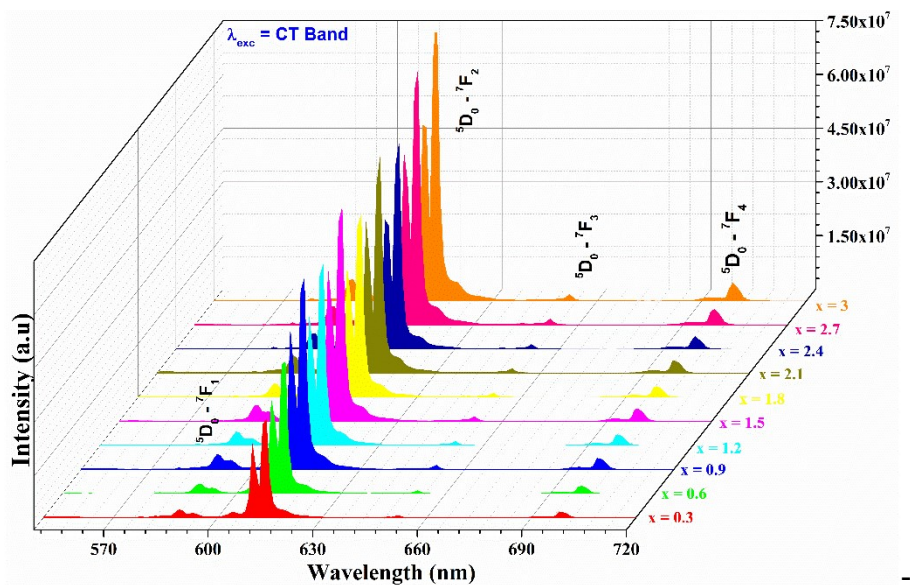

Fig. S3. PL emission spectra of  $\text{Li}_3\text{BaSrLa}_{3-x}\text{Eu}_x(\text{MoO}_4)_8$  where  $x = 0.3 - 3$  at  $\lambda_{\text{exc}} = \text{CT band}$ .

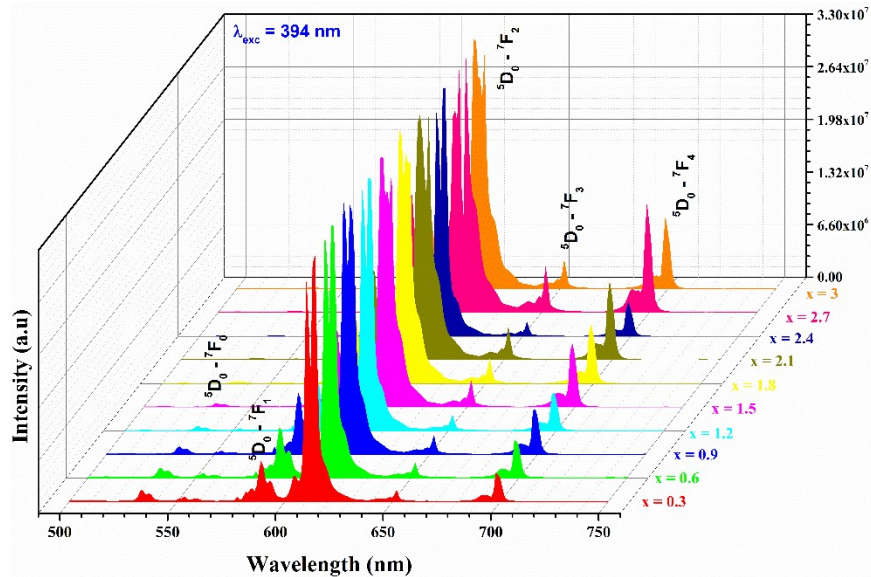

**Fig. S4.** PL emission spectra of  $\text{Li}_3\text{BaSrLa}_{3-x}\text{Eu}_x(\text{MoO}_4)_8$  where  $x = 0.3 - 3$  at  $\lambda_{\text{exc}} = 394 \text{ nm}$

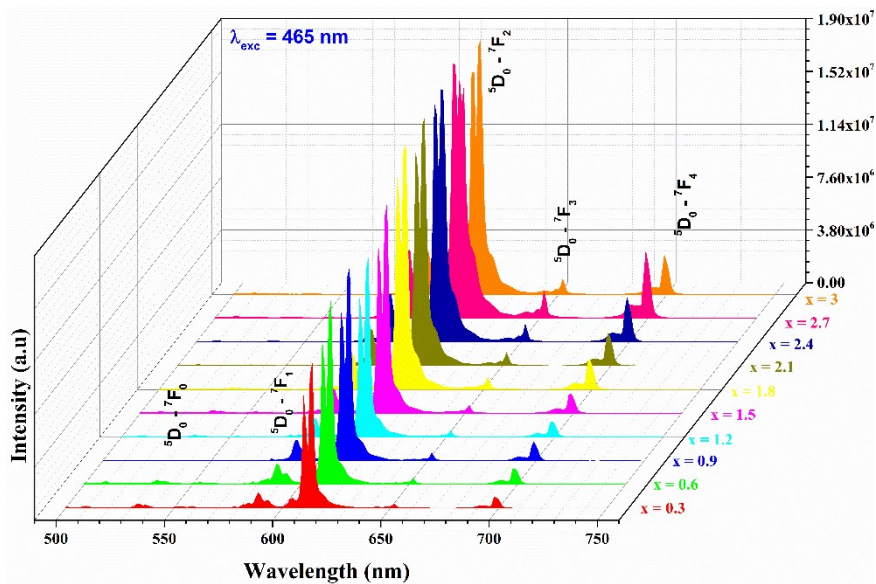

**Fig. S5.** PL emission spectra of  $\text{Li}_3\text{BaSrLa}_{3-x}\text{Eu}_x(\text{MoO}_4)_8$  where  $x = 0.3 - 3$  at  $\lambda_{\text{exc}} = 465 \text{ nm}$



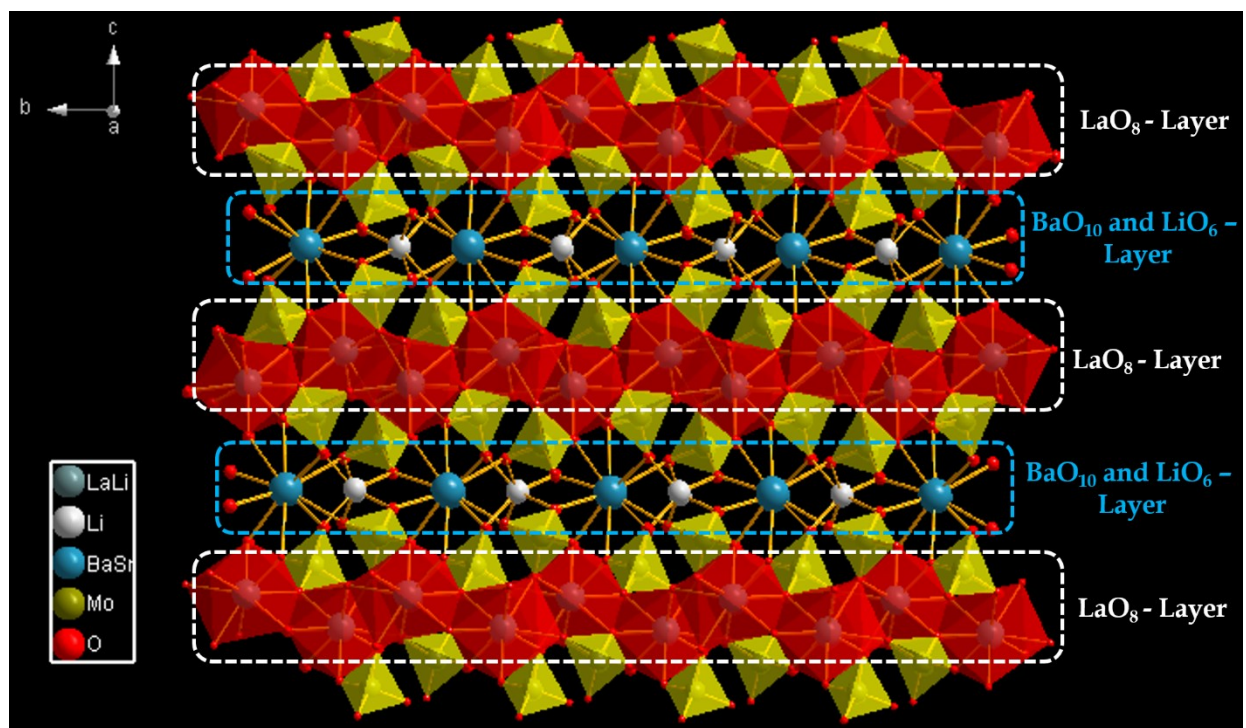

Fig S6. Layered structure of  $\text{Li}_3\text{BaSrLa}_3(\text{MoO}_4)_8$

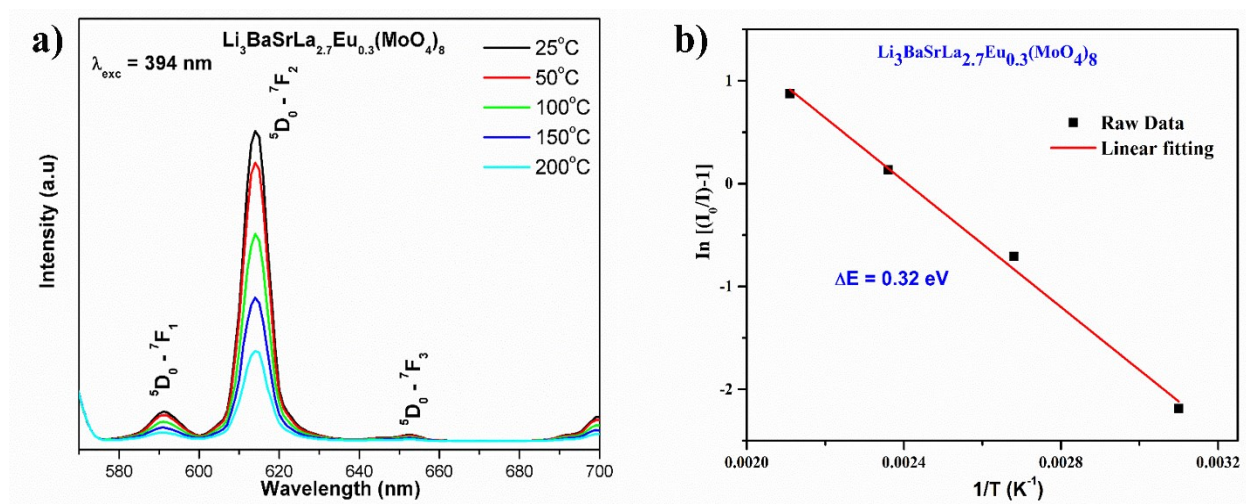

Fig. S7. a) Temperature dependence profile of emission intensity at  $\lambda_{\text{exc}} = 394 \text{ nm}$  from  $25^\circ \text{C}$  to  $200^\circ \text{C}$ , b) Plot of  $\ln(I/I_0) - 1$  versus  $1/KT$  for  $\text{Li}_3\text{BaSrLa}_{2.7}\text{Eu}_{0.3}(\text{MoO}_4)_8$  phosphor.

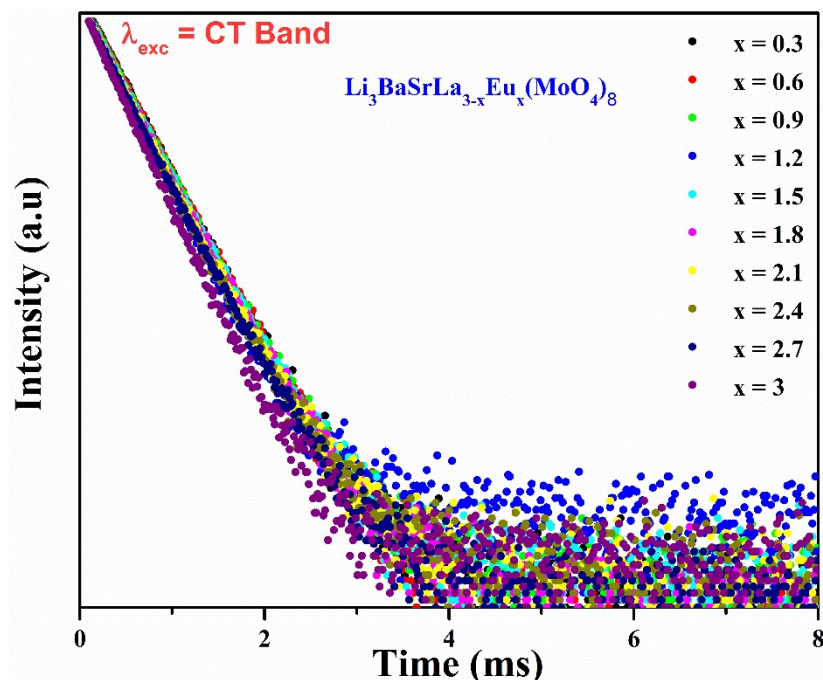

**Fig. S8.** PL lifetime for  $\text{Li}_3\text{BaSrLa}_{3-x}\text{Eu}_x(\text{MoO}_4)_8$  phosphors with different concentration under CT band nm excitation

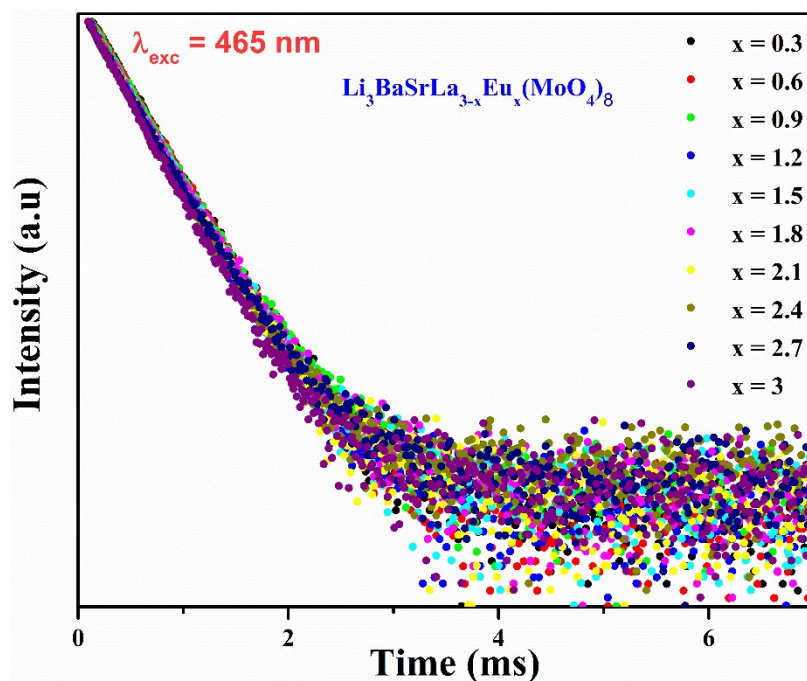

**Fig. S9.** PL lifetime for  $\text{Li}_3\text{BaSrLa}_{3-x}\text{Eu}_x(\text{MoO}_4)_8$  phosphors with different concentration under 465 nm excitation

**Table ST3** lifetime of  $\text{Li}_3\text{BaSrLa}_{3-x}\text{Eu}_x(\text{MoO}_4)_8$  in different excitation CT band, 394 and 465 nm

| Composition in terms<br>of concentration (x) | Lifetime in ms                          |                                         |                                         |
|----------------------------------------------|-----------------------------------------|-----------------------------------------|-----------------------------------------|
|                                              | $\lambda_{\text{exc}} = \text{CT Band}$ | $\lambda_{\text{exc}} = 394 \text{ nm}$ | $\lambda_{\text{exc}} = 465 \text{ nm}$ |
| 0.3                                          | 0.489                                   | 0.474                                   | 0.472                                   |
| 0.6                                          | 0.487                                   | 0.473                                   | 0.469                                   |
| 0.9                                          | 0.485                                   | 0.472                                   | 0.468                                   |
| 1.2                                          | 0.483                                   | 0.472                                   | 0.466                                   |
| 1.5                                          | 0.481                                   | 0.470                                   | 0.466                                   |
| 1.8                                          | 0.474                                   | 0.465                                   | 0.458                                   |
| 2.1                                          | 0.463                                   | 0.460                                   | 0.452                                   |
| 2.4                                          | 0.462                                   | 0.457                                   | 0.442                                   |
| 2.7                                          | 0.450                                   | 0.435                                   | 0.438                                   |
| 3                                            | 0.412                                   | 0.419                                   | 0.420                                   |

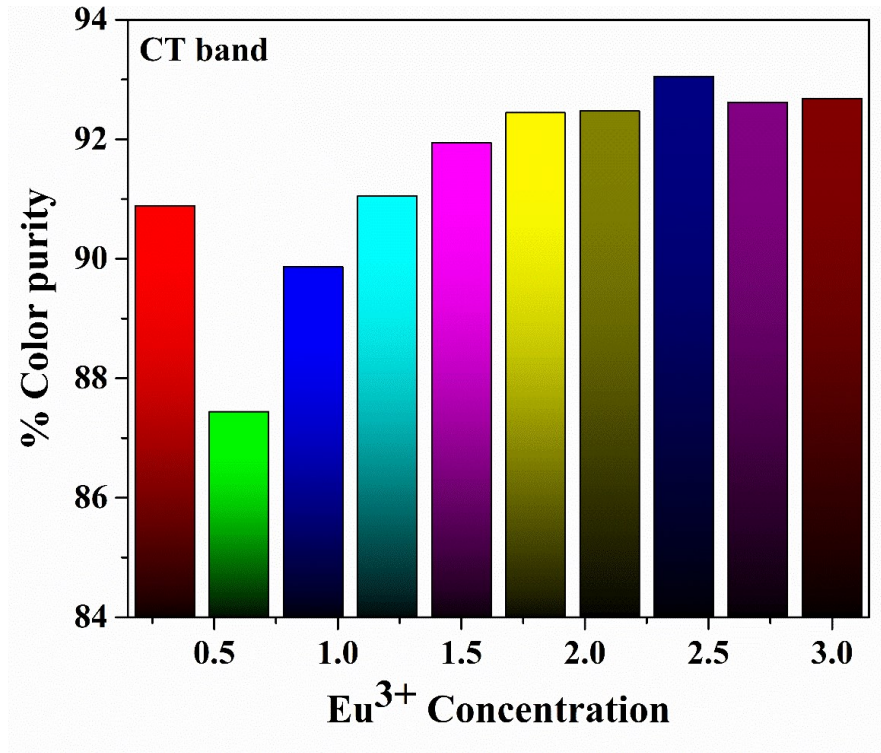

**Fig. S10.** Color purity percentage of the  $\text{Li}_3\text{BaSrLa}_{3-x}\text{Eu}_x(\text{MoO}_4)_8$  phosphors



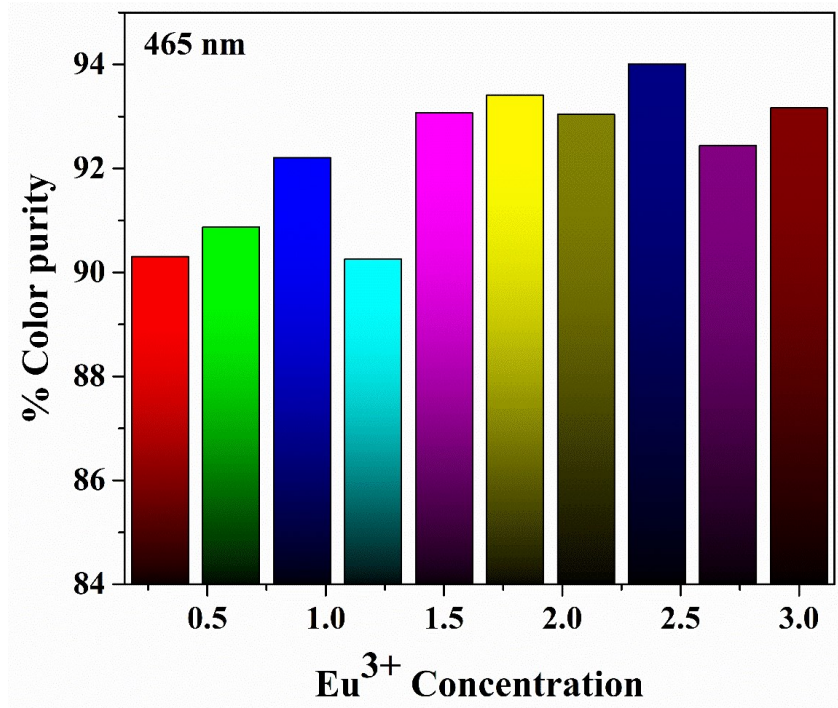

**Fig. S11.** Color purity percentage of the  $\text{Li}_3\text{BaSrLa}_{3-x}\text{Eu}_x(\text{MoO}_4)_8$  phosphors

**Table ST4** CIE chromaticity coordinates for  $\text{Li}_3\text{BaSrLa}_{3-x}\text{Eu}_x(\text{MoO}_4)_8$  where  $x = 0.3 - 3$  phosphors

| Concentration<br>in x | CIE chromaticity coordinates            |        |                                         |        |                                         |        |
|-----------------------|-----------------------------------------|--------|-----------------------------------------|--------|-----------------------------------------|--------|
|                       | $\lambda_{\text{exc}} = \text{CT Band}$ |        | $\lambda_{\text{exc}} = 394 \text{ nm}$ |        | $\lambda_{\text{exc}} = 465 \text{ nm}$ |        |
|                       | x                                       | y      | x                                       | y      | x                                       | y      |
| 0.3                   | 0.6422                                  | 0.3682 | 0.6415                                  | 0.3579 | 0.6415                                  | 0.3579 |
| 0.6                   | 0.6307                                  | 0.3588 | 0.6426                                  | 0.3568 | 0.6439                                  | 0.3555 |
| 0.9                   | 0.6403                                  | 0.3542 | 0.6458                                  | 0.3486 | 0.6495                                  | 0.3499 |
| 1.2                   | 0.6451                                  | 0.3507 | 0.6504                                  | 0.3492 | 0.6425                                  | 0.3471 |
| 1.5                   | 0.6486                                  | 0.3489 | 0.6479                                  | 0.3517 | 0.6530                                  | 0.3468 |
| 1.8                   | 0.6505                                  | 0.3486 | 0.6504                                  | 0.3493 | 0.6544                                  | 0.3452 |
| 2.1                   | 0.6508                                  | 0.3466 | 0.6477                                  | 0.3519 | 0.6529                                  | 0.3467 |
| 2.4                   | 0.6528                                  | 0.3482 | 0.6551                                  | 0.3445 | 0.6568                                  | 0.3428 |
| 2.7                   | 0.6512                                  | 0.3481 | 0.6445                                  | 0.3550 | 0.6504                                  | 0.3493 |
| 3                     | 0.6513                                  | 0.3494 | 0.6492                                  | 0.3504 | 0.6534                                  | 0.3462 |



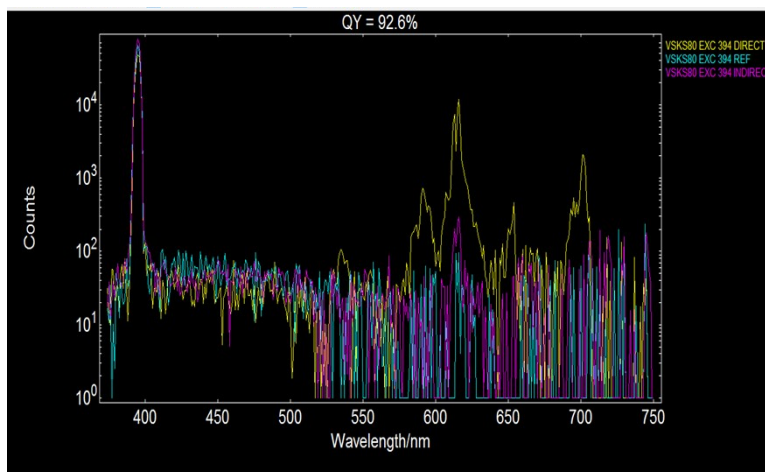

**Fig. S12.** The absolute quantum yield measurement (screen shot) for the  $\text{Li}_3\text{BaSrLa}_{0.3}\text{Eu}_{2.7}(\text{MoO}_4)_8$  phosphor

#### Experimental section of yellow organic dye:

Aldehyde (1.831 mmol, 1 eq.) and NaOH (1.831 mmol, 1 eq.) were added into a mixture of 30 mL of water and 25 mL of ethanol, then 1-phenylethanone (3.663 mmol, 2 eq.) was added. The mixture was heated and stirred at 90 °C for 4 h. After cooling, the mixture was filtered and washed with plenty of water and then dried at RT to produce a yellow powder with a yield of 80% and the synthetic scheme for the preparation of the yellow dye is shown below.

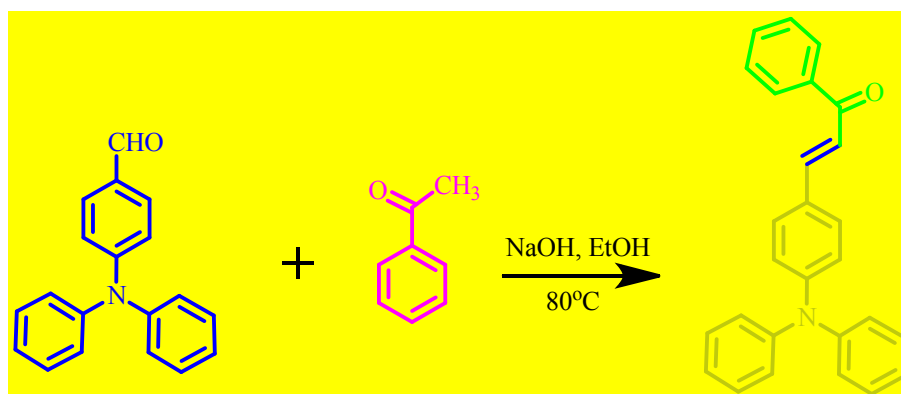

**Scheme S1.** Synthesis of TPA substituted yellow organic dye.

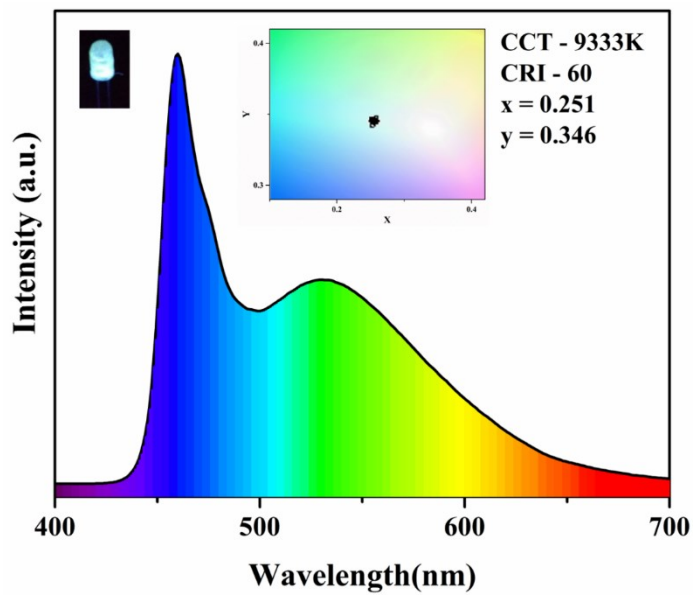

**Fig. S13** EL spectrum of white LED by using blue LED with yellow organic dye.
